# Supplementary material
Source: HighWire-hosted journal article supplement (https://thorax.bmj.com/highwire/filestream/206580/field_highwire_adjunct_files/2/thorax-2022-219391supp003_data_supplement.pdf)
Supplement: thorax-2022-219391supp003_data_supplement.pdf [file thorax-2022-219391supp003_data_supplement.pdf]

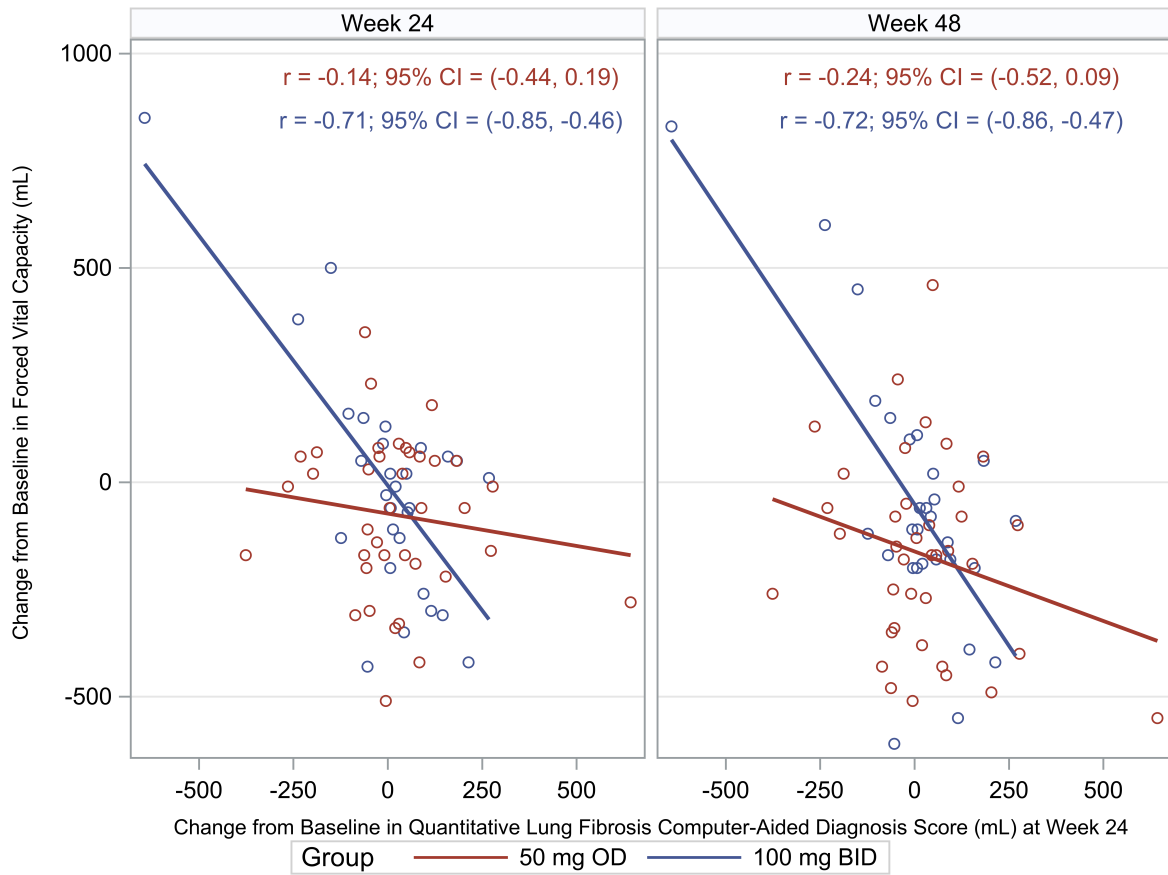

**Supplementary Figure 1: Correlation of change from baseline in quantitative lung fibrosis computer-aided diagnosis score in whole lung at week 24 with change from baseline in forced vital capacity at weeks 24 and 48**  
BID=twice daily. CI=confidence interval. OD=once daily. r=Pearson correlation coefficient.
